# 1    **Structured environments fundamentally alter dynamics and stability of ecological communities**

2    Nick Vallespir<sup>1,2</sup> Lowery & Tristan Ursell<sup>1,2,3</sup>

3    <sup>1</sup>Institute of Molecular Biology, <sup>2</sup>Materials Science Institute and <sup>3</sup>Department of Physics, University of  
4    Oregon, Eugene, OR 97403

5

## 6    **ABSTRACT**

7    The dynamics and stability of ecological communities are intimately linked with the specific interactions  
8    – like cooperation or predation – between constituent species. In microbial communities, like those found  
9    in soils or the mammalian gut, physical anisotropies produced by fluid flow and chemical gradients impact  
10    community structure and ecological dynamics, even in structurally isotropic environments. Though  
11    natural communities existing in physically unstructured environments is rare, the role of environmental  
12    structure in determining community dynamics and stability remains poorly studied. To address this gap,  
13    we used modified Lotka-Volterra simulations of competitive microbial communities to characterize the  
14    effects of surface structure on community dynamics. We find that environmental structure has profound  
15    effects on communities, in a manner dependent on the specific pattern of interactions between  
16    community members. For two mutually competing species, eventual extinction of one competitor is  
17    effectively guaranteed in isotropic environments. However, addition of environmental structure enables  
18    long-term coexistence of both species via local ‘pinning’ of competition interfaces, even when one species  
19    has a significant competitive advantage. In contrast, while three species competing in an intransitive loop  
20    (as in a game of rock-paper-scissors) coexist stably in isotropic environments, structural anisotropy  
21    disrupts the spatial patterns on which coexistence depends, causing chaotic population fluctuations and  
22    subsequent extinction cascades. These results indicate that the stability of microbial communities  
23    strongly depends on the structural environment in which they reside. Therefore, a more complete  
24    ecological understanding, including effective manipulation and interventions in natural communities of  
25    interest, must account for the physical structure of the environment.

## 26    **SIGNIFICANCE**

27    Many microbial communities of ecological and medical importance reside in complex and heterogeneous  
28    environments, such as soils or intestinal tracts. While many studies consider the effects of flow or  
29    chemical gradients in structuring these communities, how the physical structure of the environment  
30    shapes community dynamics and outcomes remains poorly understood. Using simulations of competitive  
31    microbial communities, we show that stability and dynamics qualitatively shift in environments with  
32    complex surface structures compared to open isotropic environments. Therefore, in addition to  
33    biochemical interactions between species, our work suggests that the physical structure of the  
34    environment is an equally important determinant of dynamics and stability in microbial communities, in  
35    a manner dependent on the specific patterns of interactions within that community.

## 36    **INTRODUCTION**

37    From the scale of large metazoans down to microbes, natural environments are replete with multi-species  
38    communities that compete for resources and space, and in many cases actively predate other species  
39    within their environment. Within complex ecosystems the topology and type of interactions between

40 constituent species are thought to be a primary determinants of ecosystem dynamics and stability. Typical  
41 pairwise interactions, like competition, cooperation, or predation, form the building blocks for  
42 constructing multi-species interactions and can be used to predict dynamics and stability in ‘well-mixed’  
43 environments where spatial distributions are uniform (1, 2). Interaction topology plays a particularly  
44 important role in species coexistence. For instance, in three-species intransitive competition (as in the  
45 classic rock-paper-scissors game), extinction of any species results in extinction cascades that favor  
46 dominance of a single species. Microbial systems present a particularly salient manifestation of these  
47 concepts, not only because complex communities of microbes are found in a wide array of industrial- and  
48 health-relevant environments, like soils and the mammalian gut, but also because the ability to genetically  
49 recapitulate and manipulate specific pairwise interactions biochemically makes microbial systems  
50 particularly well-suited for testing our understanding of fundamental mechanisms underlying ecosystem  
51 dynamics.

52 Characterization of interactions within ecological networks, and their corresponding biochemical  
53 mechanisms, often focuses on microbial communities in which the spatial distribution of actors can  
54 significantly impact the type and magnitude of those interactions, and the resulting population dynamics.  
55 For example, spatially localized clonal domains that result from competition between mutually killing  
56 isolates of *Vibrio cholerae* may facilitate emergence of cooperative behaviors like public good secretion  
57 (3). Similarly, large clonal domains stabilized three-way intransitive competition within a consortium of *E.*  
58 *coli* strains (4); the same consortium was unstable in well-mixed environments. Reversing the causative  
59 arrow, ecological interactions can also dictate spatial arrangements of genotypes: in simulated three-  
60 species intransitive consortia with mobile individuals, lack of a single dominant competitor leads to  
61 population waves that continually migrate throughout the environment (5), thereby ensuring dynamic  
62 and long-term stability in species representation. Conversely, in competition between two mutual killers,  
63 coarsening of clonal domains guarantees the eventual extinction of one of the species (3), unless  
64 additional interaction mechanisms are present (6). Therefore, in contrast to dynamics that play out in  
65 well-mixed environments, it is clear that the spatial distribution of organisms is an important determinant  
66 of community dynamics and long-term ecological outcomes.

67 A common condition imposed on simulations of spatially explicit ecological systems is environmental  
68 isotropy – defined by the system having the same chemical and physical properties in all directions (for  
69 example, a homogeneous 2D plane (3, 5, 7)). While such simplifications are essential in building  
70 fundamental understanding of system dynamics, they do not reflect salient environmental anisotropies  
71 found in most natural systems, such as chemical gradients, fluid flow, and complex surfaces. Despite  
72 relevance to natural communities, examination of the mechanisms by which environmental anisotropies  
73 affect ecological communities is sparse. In single species populations, colonizing complex environments  
74 can result in drastic changes in spatial distributions. For instance, using microfluidic devices, Drescher *et*  
75 *al.* showed that surface morphology and fluid shear forces interact to drive formation of novel biofilm  
76 structures in *Pseudomonas aeruginosa* (8). Biofilm formation can also disrupt fluid flow in a microfluidic  
77 mimic of soil environments, which in turn allows for coexistence of competing cheater and cooperator  
78 phenotypes of *P. aeruginosa* that are otherwise unstable under well-mixed conditions (9). Importantly,  
79 these perturbations to population structure are commensurate with length scales at which mixing occurs  
80 for *in vivo* communities such as the mammalian (10, 11) and fish (12) guts, or in dental plaque (13).  
81 Theoretical investigations indicate that similar environmental perturbations are likely to affect  
82 multispecies communities: for example, turbulent flow can disrupt spatial patterning of intransitive three-

83 species communities and thus increase the risk of extinction cascades (14), while graph theoretic  
84 approaches suggest that random perturbations to spatial lattices result in similar community  
85 destabilization (15). Together, these results suggest not only that spatial distributions of organisms  
86 influence ecological dynamics, but that the magnitude of these effects depends strongly on the specific  
87 nature of anisotropies within the environment.

88 In this work, we systematically characterized the effects of structural anisotropy on multi-species  
89 population dynamics and spatial distributions within *in silico* ecological communities. The structural  
90 attributes of these simulations are intended to capture the primary spatial structure found in natural  
91 environments, like the packing of steric soil particles or the contents and epithelial structure of the  
92 mammalian gut. Using reaction-diffusion models, we simulated asymmetrically competing two-species  
93 and intransitively competing three-species ecological networks in the presence of steric barriers arranged  
94 in a lattice within the environment. These networks and the corresponding simulations were chosen for  
95 direct comparison to previous work (3, 5) which provide clear expectations for spatial distributions and  
96 community dynamics in homogeneous environments, and which we discuss in context below. We find  
97 that the addition of environmental structure fundamentally alters community dynamics in both two- and  
98 three-species competitive systems. In the two-species case, coarsening of genetic domains that would  
99 otherwise lead to extinction of one competitor is arrested due to ‘pinning’ of competition interfaces  
100 between barriers, resulting in long-term coexistence of both species. This effect is strongly linked to the  
101 geometry of the steric barriers, and is robust to asymmetry in competitive fitness. For intransitive three-  
102 species competition, steric barriers cause interference between traveling population waves, inducing  
103 chaotic fluctuations in the abundances and spatial distributions of species and a concomitant increase in  
104 the probability of extinction cascades. Our results affirm that the trajectories, stability, and spatial  
105 structure of ecological communities are drastically altered by the structure and length scale of structural  
106 perturbations in the environment.

## 107 **RESULTS**

### 108 **Competition model**

109 We model interspecies interactions using an adapted version of the Lotka-Volterra (LV) competition  
110 framework. In the classic LV model, interaction mechanisms and fitness differences are combined into a  
111 single parameter, which realizes competition as a reduced effective carrying capacity for the focal species  
112 relative to the density of a competitor – hence there is no differentiation between e.g. competition for  
113 space and toxin-mediated killing. Here, we extend the classic framework to reflect ‘active competition’,  
114 where passive competition for space and nutrients (affecting carrying capacity) is decoupled from active  
115 competition mechanisms that directly impact growth rate, such as T6SS mediated killing or bacteriocin  
116 production (16, 17), giving the partial differential equation (PDE)

$$117 \quad \frac{\partial A_i}{\partial t} = D\nabla^2 A_i + rA_i \left(1 - \frac{A_k}{P_k}\right) \left(1 - \frac{\sum_j A_j}{C}\right).$$

118 Here  $A_i$  is the local concentration of focal species  $i$ ,  $A_k$  is the active competitor species for  $A_i$ , and the sum  
119 is over all species passively competing for space and nutrients. The primary dispersal mechanism is  
120 through diffusion characterized by  $D$ , basal growth rate is given by  $r$ , and carrying capacity by  $C$ . Active  
121 competition is characterized by the concentration parameter  $P$ , where lower values of  $P$  indicate more  
122 potent active competition (i.e. lower concentrations of the active competitor are required to cause death).

123 This framework explicitly models passive fitness differences (through  $C$ ) and anti-competitor mechanisms  
124 (through  $P$ ), thereby capturing two basal and distinct mechanisms of microbial competition. This model  
125 is appropriate for describing local competitive interactions, like contact-mediated killing or local killing by  
126 secreted toxins. Additional PDEs would be required to describe highly motile cells, exogenous gradients,  
127 or the production, potency, and transport of rapidly diffusing secreted toxins. This set of PDEs establishes  
128 a baseline set of assumptions and corresponding phenomena from which to build more complex models.

129 In this work, we focus specifically on the competitive effects, and assume constant growth rates  $r$ ,  
130 diffusion  $D$ , and carrying capacities  $C$  for all species in the community. This simplification allows the  
131 population density to be scaled by carrying capacity and the time to be scaled by the growth rate, which  
132 reduces the parameter space of the model leaving the dimensionless version of  $P$  (i.e.  $P/C$ ) as the single  
133 free parameter that dictates the strength of active interspecies competition

$$134 \quad \frac{\partial A_i}{\partial t} = \nabla^2 A_i + A_i \left(1 - \frac{A_k}{P_k}\right) (1 - \sum_j A_j).$$

135 Here time is in units of  $r^{-1}$ , length is in units of  $\sqrt{D/r}$ , and organismal concentrations  $A_i$  (i.e. number per  
136 unit area) are in units of  $C$ , therefore  $0 \leq A_i \leq 1$ . The natural length scale  $\lambda = \sqrt{D/r}$  is proportional to  
137 the root mean squared distance an organism will move over a single doubling time.

138 We used this non-dimensionalized model to simulate communities in a 2D environment into which we  
139 introduce structural anisotropy via a lattice of steric pillars (see Figures 1 and 3). Like a grain in soil or  
140 tissue in a gut, these pillars do not allow free transport through them, nor microbes to occupy them; their  
141 perimeter is a reflecting boundary condition. Structural perturbations were explored by introducing a  
142 triangular lattice of steric circular pillars, with each lattice fully characterized by the radii of the pillars  $R$   
143 and the center-to-center spacing of the pillars  $\Delta x$ , with each simulation evolving in a square domain of  
144 side length  $L$ . These parameters (pillar radius  $R$ , pillar spacing  $\Delta x$ , and simulation size  $L$ ) are reported in  
145 units of  $\lambda$ . We then characterized the impact of these perturbations on the spatial distribution and  
146 dynamics of *in silico* communities across structural length scales by monitoring the distributions and  
147 abundances of resident community members as we varied the radius and density of pillars within the  
148 simulation environment.

## 149 **Competition between two mutual killers**

### 150 *Structured environments arrest genetic phase separation*

151 For an actively competing two-species community in an isotropic environment, recent theoretical and  
152 experimental work indicates that species phase separate according to genotype, with the eventual  
153 extinction of one species via domain coarsening (3). In contrast, we find that when morphological  
154 structure is introduced into the environment genetic phase separation is arrested, resulting in stable  
155 coexistence of mutually killing genotypes (Figure 1, Supplemental Movie 1). Arrest occurs by ‘pinning’ of  
156 competition interfaces between steric barriers (i.e. pillars). In both isotropic and anisotropic  
157 environments, coarsening of genetic domains is driven by the curvature of competition interfaces. If  
158 competition is symmetric, a flat interface will not move, whereas a curved interface will translate toward  
159 the center of the circumscribing circle. In isotropic conditions, stable flat interfaces are the exception,  
160 only found in the rare case where a single flat interface bisects the entire environment, which is itself  
161 increasingly unlikely in larger environments. Thus, all domains enclosed by a competitor will eventually  
162 be consumed and one of the competitors will go extinct. In contrast, we find that flat competition

163 interfaces are stabilized between steric barriers, resulting in the arrest of domain coarsening and  
 164 subsequent long-term coexistence of both species (Figure 1). Importantly, for symmetric competition we  
 165 observed that the size and/or density of pillars had little effect on community stabilization (left edge of  
 166 Figure 2A), suggesting that for well-matched competitors even slight structural perturbations that allow  
 167 for interface pinning may be sufficient to foster coexistence.

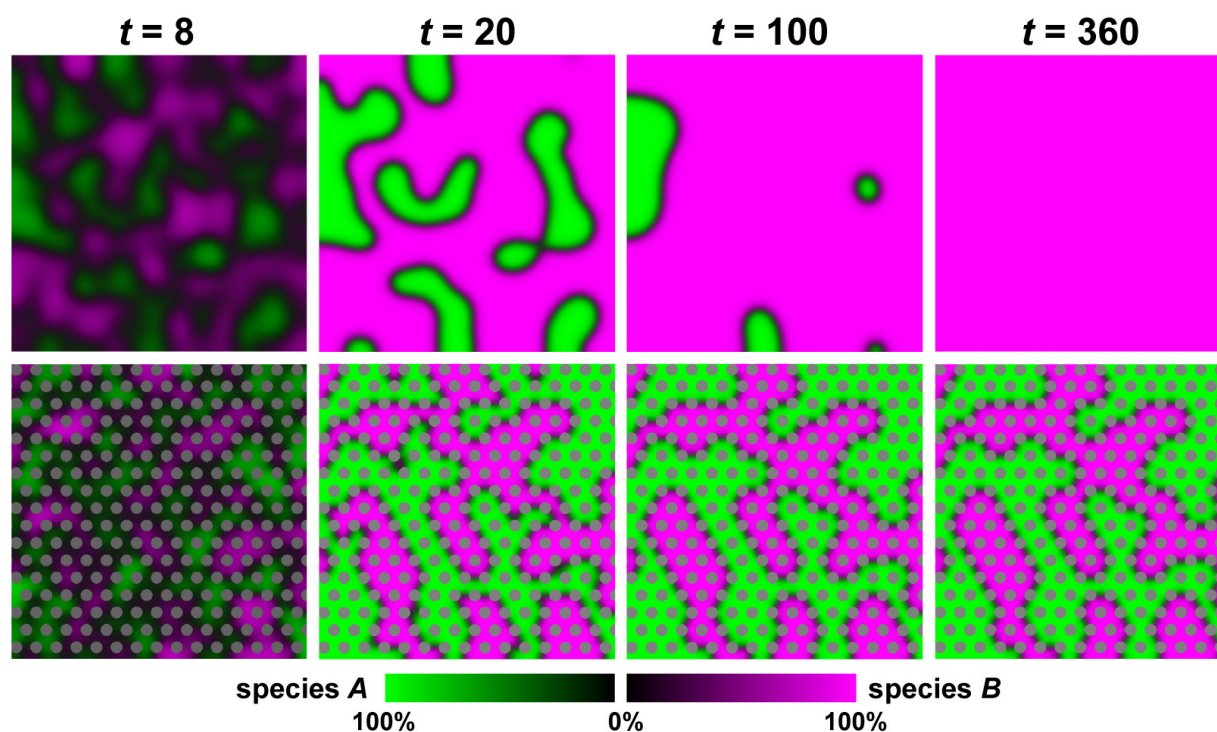

168  
 169 **Figure 1: Structurally anisotropic environments arrest genetic phase separation in two-species systems, resulting**  
 170 **in long term coexistence.** Panels depict snapshots from simulations of two-species competition in structurally  
 171 isotropic (top row) and anisotropic (bottom row) environments, with color intensity reflecting species abundance,  
 172 and pillars shown in grey. Time is measured in doubling times. Under isotropic conditions, domain coarsening  
 173 robustly leads to extinction of one of the species. Anisotropic environments, however, allow for local pinning of  
 174 competition interfaces, resulting in arrest of domain coarsening and thereby sustained coexistence. Simulation  
 175 parameters are  $L / (1.29 \lambda) = 100$  and  $P = 0.1$ , with  $R / (1.29 \lambda) = 2$  and  $\Delta x = 3.4 R$  for the anisotropic case.

176  
 177 *Pinning of genetic domain interfaces is robust to asymmetric competition*

178 When one species is a more potent competitor (e.g.  $P_A > P_B$ ), even the symmetry of an environment fully  
 179 bisected by a linear competition interface will result in extinction of the weaker competitor. While flat  
 180 interfaces balance symmetric competition, they are not stable when one species has a competitive  
 181 advantage, and instead will translate through space. Likewise, when competition is asymmetric in an  
 182 isotropic environment, over an ensemble of random initial conditions the dominant competitor will drive  
 183 the weaker competitor to extinction in the overwhelming majority of cases. We wanted to know if  
 184 structural perturbations could stabilize coexistence even when competition was asymmetric. Thus we  
 185 performed simulations identical to those described above, but varied the ratio of the competition  
 186 parameters,  $P_A/P_B$ , while holding their mean constant. We observed that stable coexistence via interface



187 pinning was robust to asymmetric competition (Figure 2, Supplemental Movie 2) within certain regimes  
 188 of the lattice parameters. The mechanism, however, was somewhat counterintuitive: for a given degree  
 189 of competition asymmetry,  $P_A/P_B$ , there exists some critical interface curvature that balances the numeric  
 190 advantage of the weaker species against the competitive advantage of the more potent species (Figure  
 191 2B, inset). This is true regardless of the presence of environmental structure; however, in isotropic  
 192 conditions this competitive equilibrium is unstable, and any perturbation of domain curvature will result  
 193 in interface translation and eventual extinction. We found that structural perturbations stabilize the  
 194 competitive equilibrium created by curved competitive interfaces if the spatial structure of the  
 195 environment can support the critical curvature between two steric surfaces (Supplemental Text 1) -- only  
 196 then will phase separation halt and coexistence be maintained. Otherwise, the dominant competitor will  
 197 drive the weaker species to extinction (Figure 2A), with slower dynamics than isotropic conditions.

198

199

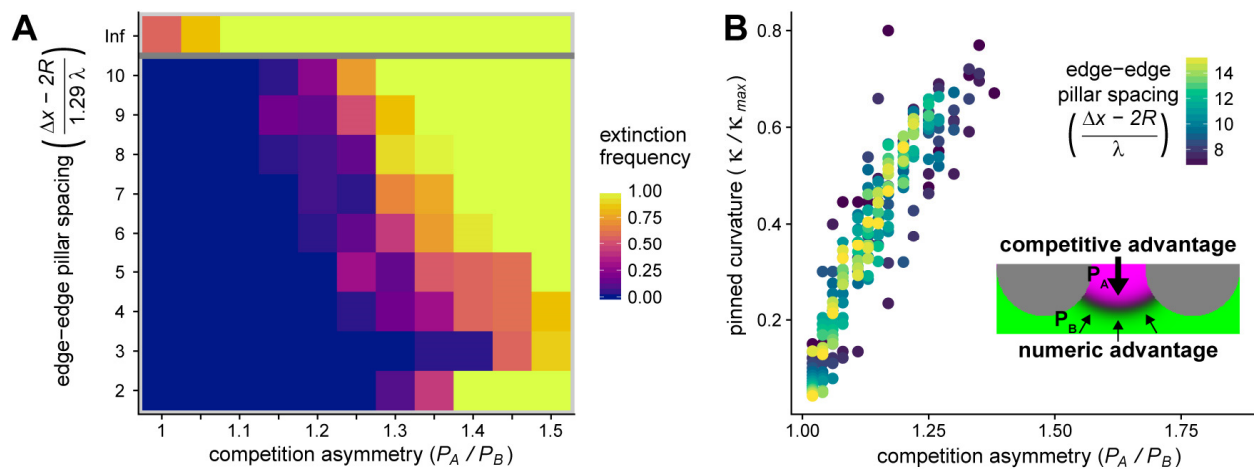

200

201 **Figure 2: Coexistence of species with asymmetric competitive fitness is maintained by pinning of competition**  
 202 **interfaces.** **A**, Extinction frequency from 30 replicate simulations per coordinate over 2000 doubling times as a  
 203 function of competition asymmetry and pillar spacing. Here, the ratio  $\Delta x / R$  is held constant at 3, while varying the  
 204 lattice constant  $\Delta x$  relative to the natural length scale  $\lambda$ . Data for isotropic environmental conditions (no pillars)  
 205 are depicted above the grey line – note that the reason some simulations were not observed to go extinct was due to  
 206 insufficient simulation duration; with more time, all isotropic simulations would go extinct. Higher pillar density  
 207 stabilizes coexistence between strains with larger competitive asymmetries, up to the point at which the  
 208 environment cannot sustain sufficiently large domains to stabilize the competition interface; this produces the  
 209 increase in extinction frequency at bottom right (see Supplemental Movie 2). Simulation parameters are  $L / (1.29 \lambda)$   
 210 = 100 and the average competition strength  $(P_A + P_B)/2$  is held constant at 0.1. **B**, Stable interface curvature ( $\kappa$ )  
 211 relative to the maximum possible interface curvature ( $\kappa_{max}$ ) as a function of competitive asymmetry (see  
 212 Supplemental Text 1). Edge-to-edge pillar spacing is indicated by point color. Pinning and stable coexistence was  
 213 observed for competitive asymmetries greater than 1.35 (see panel A), but were omitted in B because pillar spacings  
 214 were too small for reliable curvature estimation. The inset schematically depicts stable curved interfaces, where the  
 215 numerical advantage of the weaker competitor species (green) balances the advantage of the stronger competitor  
 216 species (magenta). See methods for description of curvature calculation.

217

218 Using geometric and scaling arguments (Supplemental Text 1), we predicted that the critical curvature  
219 should be an approximately linear function of the competitive asymmetry and confirmed this with our  
220 simulations (Figure 2B). Unlike symmetric competition, where coexistence is fully determined by flat  
221 competition interfaces, the curved interfaces required to equilibrate asymmetric competition also impose  
222 a minimum stable domain size on the competitively disadvantaged species that depends on the lattice  
223 parameters. This is because a sufficiently large population of weak competitors is required to compensate  
224 for competitive losses at the interface through growth and diffusion (note the increased levels of  
225 extinction with the smallest pillar spacings in Figure 2A, and the dissolution of domains in Supplemental  
226 Movie 2 that were stable under the symmetric competition of Supplemental Movie 1).

### 227 **Three species intransitive competition**

#### 228 *Environmental structure disrupts three-species dynamics*

229 Previous *in silico* simulations of an intransitively competing three-species network (i.e. displaying a cyclic  
230 competitive hierarchy, as in the game rock-paper-scissors) within an isotropic environment resulted in the  
231 formation of striking spiral wave patterns, in which dense waves of species constantly migrate throughout  
232 the environment, with each species wave chasing its prey and being followed by its predator (see (5), and  
233 recapitulated in our model in Figure 3A). Despite constant flux of species at small length scales, the  
234 community exhibited stable coexistence of all three species on ecological time scales (more than  $10^4$   
235 generations) when provided with a sufficiently large environment relative to the natural length scale set  
236 by diffusion and growth. These findings agree with the earlier experimental results of Kerr et al. (4), albeit  
237 at different time and length scales. However, it should be noted that previous theoretical work indicates  
238 that fluctuations (18) or finite number effects (19) can force such systems into heteroclinic cycles that  
239 eventually lead to extinction cascades.

240 Given the drastic changes in ecological outcomes when structural perturbations were introduced in two  
241 species competitive systems, we wanted to characterize how dynamics and outcomes changed in three  
242 species competition when we included structural perturbations. We performed simulations using the  
243 same set of governing equations as in the two species case, now accounting for the topology a cyclic  
244 competitive hierarchy and imposing fully symmetric competition for simplicity. We found that the  
245 introduction of spatial structure into the environment significantly destabilizes wave patterns observed  
246 under isotropic conditions in a manner that strongly depends on the spacing and size of steric barriers  
247 (Figure 3). For example, while densely packed barriers prevent regular pattern formation and result in  
248 erratic fluctuations in species abundance (Figure 3C), increasing the space between pillars by a small  
249 amount allows the system to re-establish wave patterns that dominate the environment and significantly  
250 reduce the magnitude of population fluctuations (Figure 3B). We therefore set out to characterize the  
251 complex dynamics arising from intransitive competition in structured environments, with special  
252 attention paid to transitions in population dynamics as a function of quantitative changes in  
253 environmental structure.

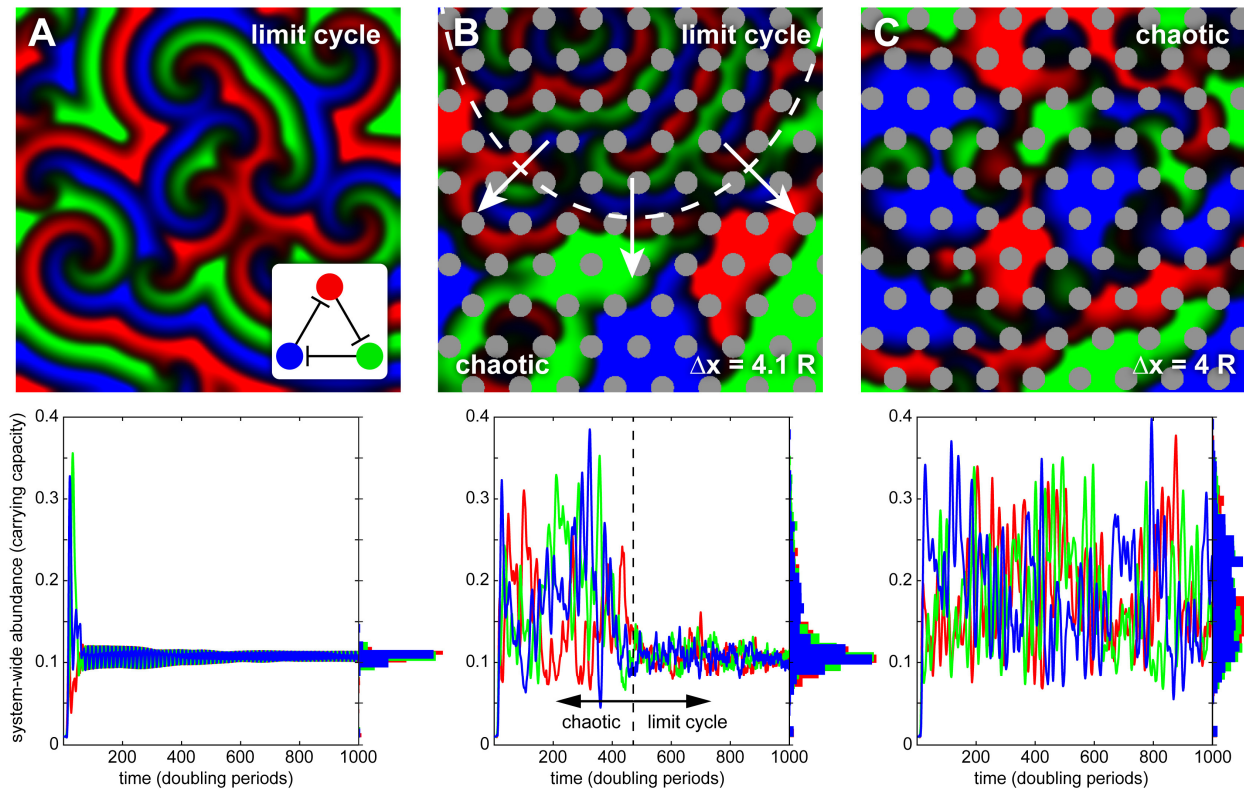

254

255 **Figure 3: Structurally anisotropic environments disrupt spatial patterns and cyclic dynamics in intransitively**  
 256 **competing 3-species communities.** Top panels show snapshots of spatial distributions from representative  
 257 simulations, with corresponding abundance dynamics plotted below. **A**, following a brief ‘grow-in’ period, isotropic  
 258 conditions result in spiral waves and cyclic abundance dynamics with corresponding stable coexistence. **B**,  
 259 introduction of pillars disrupts cyclic pattern formation, leading to irregular spatial distributions and large  
 260 fluctuations in species abundance. However, in this example the system eventually transitions into a stable cyclic  
 261 state, indicated by dashed boundaries in top and bottom panels, with arrows in the top panel indicating the direction  
 262 of the expanding cyclic region. **C**, more densely packed pillars hinder transition to a limit cycle, resulting in sustained  
 263 large fluctuations in abundance and irregular species distributions. Simulation parameters are  $L / \lambda = 158$ ,  $P = 0.1$ ,  
 264 and for simulations including pillars  $R / \lambda = 4.74$  and  $\Delta x$  as indicated.

265

266 *Introducing structural anisotropy leads to chaotic fluctuations in species abundance and extinction*  
 267 *casades*

268 To quantify how structural perturbations destabilize pattern formation and cyclic dynamics in our  
 269 deterministic simulations, we examined the dynamic trajectories of multiple replicates of the same steric  
 270 pillar array initialized with controlled, random differences in the initial distributions of the three species.  
 271 We then compared the correlations in species distributions between replicate simulations as the system  
 272 evolved. In contrast to limit-cycle dynamics in isotropic environments, we found that increasing pillar  
 273 density resulted in extreme sensitivity to perturbations of initial conditions with an exponential decay in  
 274 initial correlations through time (Figure 4), a hallmark of chaotic dynamics (20). Chaotic fluctuations were  
 275 accompanied by rapid transitions into extinction cascades (evident in Figure 4, where correlation traces  
 276 are truncated at the first extinction event among replicates).



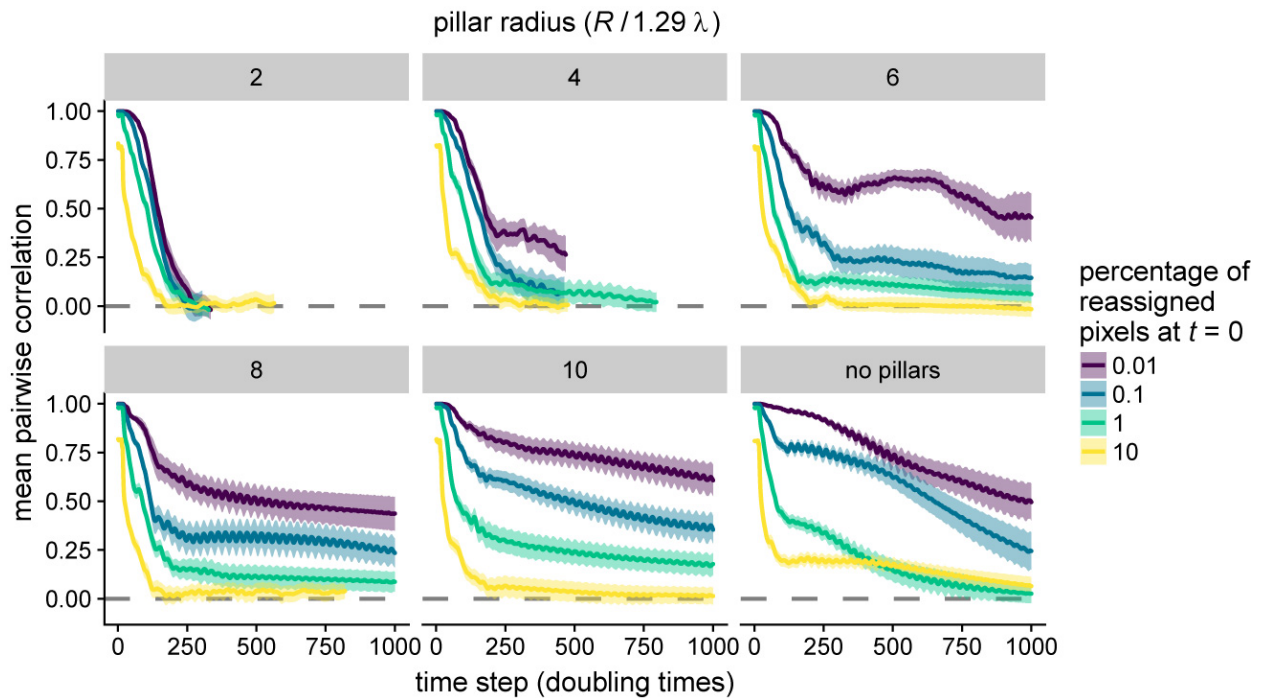

277

278 **Figure 4: Ecological dynamics display extreme sensitivity to initial conditions depending on environmental**  
 279 **structure.** In each panel, 10 replicate simulations were identically initialized, then a small percentage (indicated by  
 280 line color) of grid locations in each replicate were randomly re-sampled creating correlated initial conditions. Each  
 281 panel shows the spatial (pixel-by-pixel) correlation over time between replicate simulations, averaged over all 45  
 282 unique pairwise comparisons. Shaded regions indicate standard error of the mean. As the pillar array becomes  
 283 denser, rapid decorrelation among replicates results from minute perturbations to initial conditions, a hallmark of  
 284 chaotic dynamics. In contrast, as pillar spacing increases, some fraction of simulations fall into a limit cycle and thus  
 285 have non-zero correlations with similar initial conditions. Simulation parameters are  $L / (1.29 \lambda) = 100$ ,  $P = 0.1$ , and  
 286  $\Delta x = 4 R$ , with pillar size  $R$  indicated at the top of each panel.

287

288 In initial simulations, we noted that species distributions often exhibited dynamic transitions between  
 289 patterns of spiral waves and chaotic fluctuations (Figure 3B), and thus we sought to characterize overall  
 290 system dynamics as a function of environmental structure. We performed simulations with uncorrelated  
 291 initial conditions across a range of pillar sizes and spacings, and classified system dynamics as ‘limit cycle’  
 292 or ‘chaotic’ by calculating the temporal autocorrelation of the spatial species distribution. If the  
 293 spatiotemporal autocorrelation of all three species (minus steric barriers) at time  $t$  reached an  
 294 autocorrelation above a threshold of 0.8 two or more times after  $t$ , we defined the dynamic state as cyclic  
 295 at time  $t$  (see Supplemental Figure 8 & Methods). With this definition, we classified the dynamics as a  
 296 function of  $R$  and  $\Delta x$  into pseudo-phase diagrams for fraction of time spent in cyclic dynamics (Figure 5A)  
 297 and the extinction frequency over the simulation time scale (Figure 5B). Example simulations are provided  
 298 in Supplemental Movies 3-6. We found that smaller and more densely packed pillars lead to greater  
 299 destabilization, with less time spent in limit cycle dynamics and higher rates of extinction. Intriguingly,  
 300 however, with the smallest and most densely packed pillar structures we observed a reduced extinction  
 301 frequency, reversing the trend seen at larger pillar spacings (Figure 5B, bottom row). This appears to be  
 302 specific to the mechanisms by which pillars destabilize the system. With large pillars and spacings, spiral

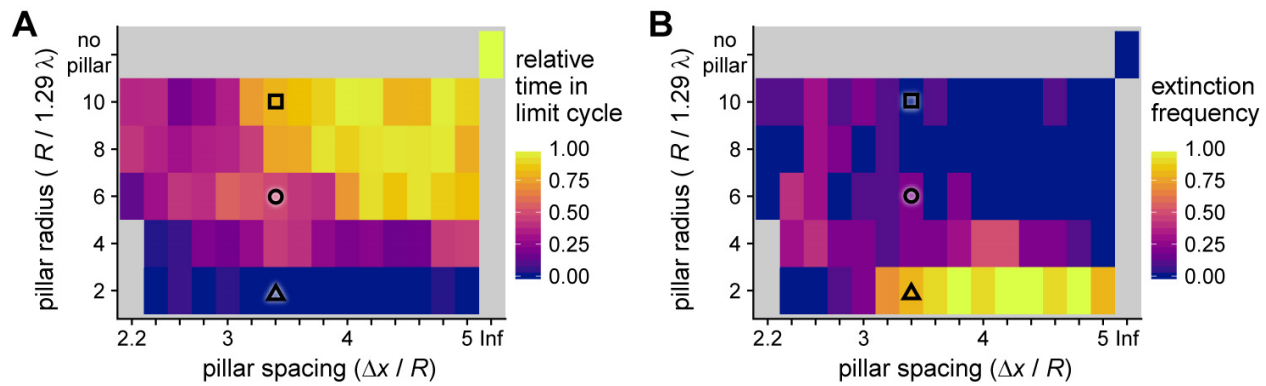

303

304 **Figure 5: Severity of chaotic disruptions depend on structural characteristics of the environment.** Over 1,000  
 305 doubling times, **A** shows the fraction of time the system displayed cyclic dynamics and **B** shows extinction frequency,  
 306 both as functions of the size and spacing of the pillar array. 10 simulations were performed for each grid point. For  
 307 each simulation, the amount of time spent in a limit cycle was normalized by the average time that isotropic  
 308 simulations were classified as cyclic; this adjusts for systematically acyclic periods such as the grow-in phase. Three  
 309 primary dynamic regimes were identified: (i) stable cycles, with larger and widely-spaced pillars; (ii) a transitory  
 310 region at intermediate pillar size and spacing, where communities tend to either relax into a limit cycle or collapse;  
 311 and (iii) when pillars are small and densely packed, unstable chaos with rapid community collapse. Simulation  
 312 parameters are  $L / (1.29 \lambda) = 100$  and  $P = 0.1$ , with pillar size and spacing as indicated in the figure. The simulations  
 313 at  $R / (1.29 \lambda) = 2$  and  $4$  with  $\Delta x / R = 2.2$  were omitted because the pillar spacing did not allow for accurate simulation  
 314 of diffusion. Black symbols correspond to simulation conditions whose extinction time distributions were analyzed  
 315 in Figure 6.

316

317 waves develop in open areas and are largely unperturbed by the pillars, resulting in cyclic behavior and  
 318 few extinctions (Supplemental Movie 3). As pillar spacing decreases, open areas narrow to the point that  
 319 spiral wave centers are destabilized, migrating erratically and eventually collapsing due to interference  
 320 from other wave fronts (Supplemental Movie 4). With smaller pillar radii, the pillars themselves often act  
 321 as wave centers, and appear to be particularly vulnerable to disruption via interference (Supplemental  
 322 Movie 5). However, when small pillars are so densely packed that a pillar cannot serve as a wave center,  
 323 the centers again migrate erratically between pillars, but the pillar density is high enough to ‘cage’ the  
 324 rapidly diffusing wave centers and prolong their existence in a chaotically fluctuating state (Supplemental  
 325 Movie 6). Thus, the prevalence of extinction cascades is a non-monotonic function of pillar density,  
 326 suggesting that intermediate scales of spatial structure produce the strongest destabilizing effects on  
 327 intransitive communities. Finally, to ensure that the observed changes to system dynamics and  
 328 corresponding destabilizing effects were not dependent on the symmetry of a triangular lattice, we  
 329 performed a subset of simulations where pillar radii or spacing were independently and randomly  
 330 perturbed, and no significant changes to system dynamics and ecological outcomes were observed  
 331 (Supplemental Figure 9).

332 *A three-state kinetic model describes coupling of dynamic transitions and extinction*

333 In our three-species simulations we observed transitions from chaotic dynamics to limit cycles and back  
 334 again, with many simulations ultimately making the transition from chaotic dynamics to the fully  
 335 absorbing state of extinction. Though the simulations are deterministic, the ensemble of initial conditions

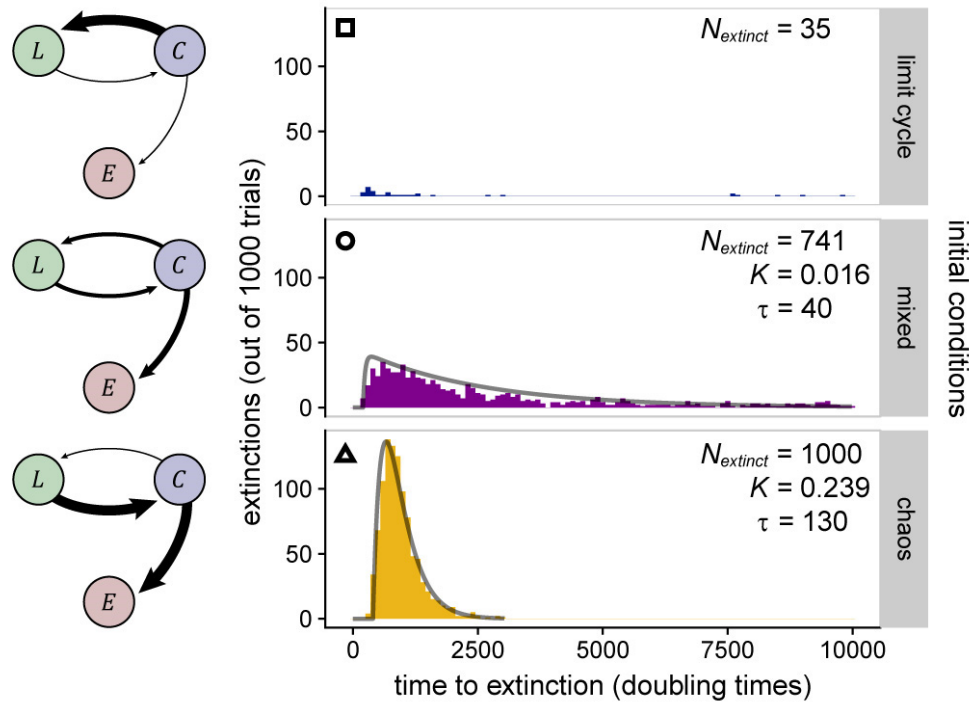

336

337 **Figure 6: A kinetic model of dynamic transitions predicts extinction time distributions for a range of**  
 338 **environmental structures.** From the lattice structures indicated by overlaid symbols in Figure 5 (indicated here at  
 339 top left in histogram plots), we performed 1,000 replicate simulations for 10,000 doubling times to measure the  
 340 distribution of extinction times and compare them to our model predictions. These conditions typify the three  
 341 observed dynamic regimes (limit cycle, transitory and chaotic), and map to a three-state model of system dynamics  
 342 with two correlated rate parameters that depend on structural characteristics (Supplemental Text 2). The  
 343 histograms were constructed from observed extinction times, and grey lines are fits to probability distributions  
 344 predicted from the three-state model. Fitting was not attempted for the cyclic case (top row), as only 3.5% of  
 345 simulations were observed to go extinct over the simulation period. The number of extinctions and (where  
 346 applicable) the fit parameters are shown within the corresponding plots. At left, connections between the dynamical  
 347 states of limit cycle (L), chaotic (C), and extinction (E) are depicted with relative rates qualitatively indicated by the  
 348 width of the arrows. Simulation parameters are  $L / (1.29 \lambda) = 100$  and  $P = 0.1$ , with pillar size and spacing as indicated  
 349 in the figure.

350

351 create statistical variability in system dynamics. Thus, we wanted to characterize how the distribution of  
 352 extinction times, and hence the time scale of coexistence, depended on environmental structure. We  
 353 developed a three-state kinetic model to describe transitions between chaotic (C), limit cycle (L), and  
 354 extinct (E) states, using three positive rate parameters to connect the states ( $k_{CL}$ ,  $k_{LC}$ , and  $k_{CE}$ ). The closed-  
 355 form solution to our model (Supplemental Text 2) predicts that all systems with structural perturbations  
 356 will go extinct in the infinite time limit, which is consistent with previous work (18, 19). It also predicts  
 357 that the rates of arrival to the extinct state depend on the dynamics fostered by the environmental  
 358 structure. To test this, we used structural conditions whose initial dynamics were classified as either limit  
 359 cycle, chaotic, or mixed for the first 1,000 doubling times (marked tiles in Figure 5), and fit the observed  
 360 distribution of arrival times as a function of environmental structure to those predicted by the model over  
 361 a period of 10,000 doubling times. We found that our model recapitulated observed distributions of

362 extinction times (Figure 6), and that indeed, changes in environmental structure had significant effects on  
363 the distribution of extinction times. These results indicate that structurally-induced destabilization results  
364 from a combination of decreased rates of transition from chaotic fluctuations to limit cycle dynamics  
365 and/or increased rates of transition from chaotic dynamics to extinction (see model diagrams in Figure 6).  
366 Accordingly, systems that remained largely in a limit cycle had slower rates of extinction. The fitted model  
367 parameters were functions of multiple individual transition rates with complex mappings (Supplemental  
368 Text 2), hence direct inference of the effects of structural perturbations on individual transition rates (e.g.  
369 from limit cycle to chaos) were not possible with this model.

### 370 *Larger systems prolong species coexistence despite chaotic fluctuations*

371 Lastly, we sought to characterize the effect of system size on community stability. Holding the structure  
372 of the pillar array constant, we observed that the mean time to an extinction cascade increased  
373 approximately exponentially with increasing system size (Figure 7A). This suggests that with sufficiently  
374 large systems relative to the natural length scale, communities can coexist for long periods despite  
375 continual chaotic fluctuations in individual species abundances and distributions. However, consistent  
376 with the predictions of our kinetic model (Figure 6), larger systems cannot fully prevent extinctions, as  
377 evidenced by observed extinction frequencies when simulation times were extended. In Figure 7B we  
378 show that for a given simulation duration there is a system size above which the extinction frequency  
379 drops to nearly zero, however, simply extending the simulation time can push the extinction frequency to  
380 unity.

## 381 **DISCUSSION**

382 Using *in silico* simulations of ecological communities, we found that addition of structural complexity to  
383 the environment results in fundamental changes to community dynamics and outcomes in a manner  
384 dependent on the specific interaction network topology. Specifically, we observed that for two mutually  
385 competitive species, structurally complex environments allowed for long-term coexistence between  
386 species with relatively large differences in competitive fitness, an outcome impossible in well-mixed or  
387 isotropic environments. Conversely, for a three-species intransitively competing community, which is  
388 expected to be stable under isotropic conditions (5), we found that environmental structure can disrupt  
389 the dynamic spatial patterns that stabilize these communities, resulting in chaotic fluctuations in species  
390 abundances and spatial distributions, and an increased frequency of extinction cascades. Together, these  
391 findings strongly suggest that the physical structure of the environment can interact significantly with the  
392 specific nature of interspecies interactions within resident communities to affect stability and dynamics,  
393 and more generally indicate that physical attributes of the environment must be considered when  
394 assessing the stability of resident communities.

395 Our results extend established findings that spatially structured communities maintain biodiversity by  
396 localizing interactions among community members (7, 21, 22). In particular, in the context of simple  
397 competition the spatial bottlenecks that structurally complex environments provide impede competitive  
398 mechanisms to the point that only a small fraction of a given population is engaged in active competition,  
399 and hence fitness differences become less important relative to geometric advantages provided by  
400 specific localization within the environment. However, our findings also suggest that intransitive  
401 interaction networks are not a robust means of stabilizing communities, as has been theoretically  
402 postulated (23, 24). Likewise, if deviation from isotropic conditions (which is found in virtually all natural

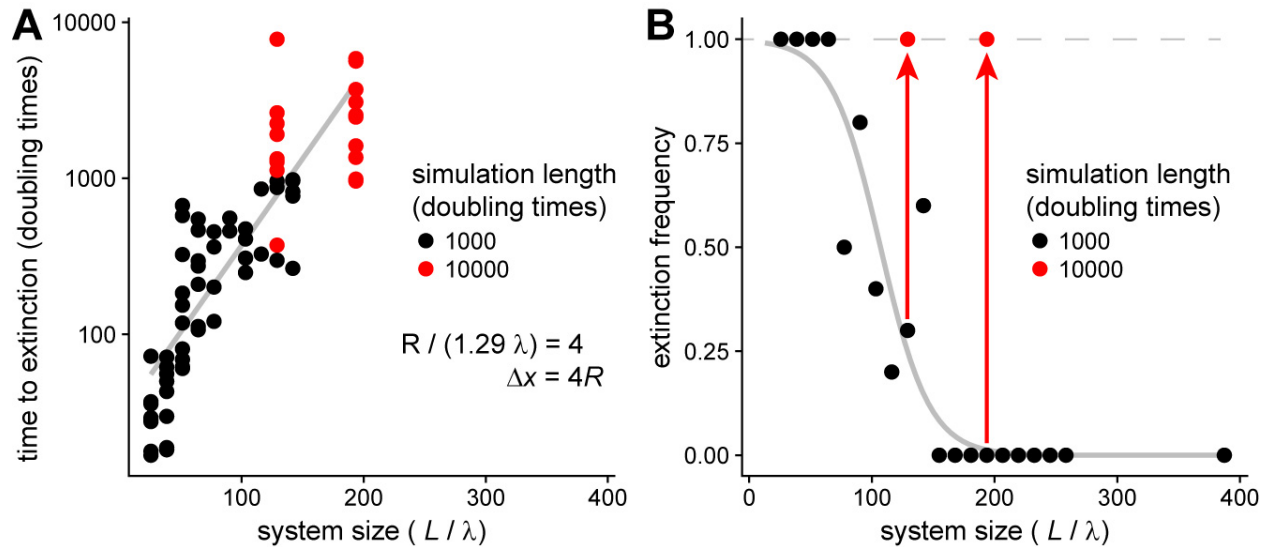

403

404 **Figure 7: Larger system sizes delay but do not prevent extinction cascades.** **A**, plotting time to extinction as a  
 405 function of system size reveals an approximately exponential relationship, suggesting that large systems can persist  
 406 in a state of chaotic fluctuation for long time periods. Each point is a single simulation, with 10 replicate simulations  
 407 per system size  $L$ . **B**, extinction frequency as a function of system size. The black points and fitted grey logistic  
 408 regression curve suggest a critical system size at which extinctions are no longer observed for the fixed number of  
 409 simulated doubling times (here, 1,000). However, by increasing simulation duration, the observed extinction  
 410 frequency saturates to approximately 1 (red points and arrows), indicating that large systems delay but not prevent  
 411 extinction, consistent with our model which predicts that all anisotropic environments will eventually end with an  
 412 extinction cascade. Simulation parameters are  $R / (1.29 \lambda) = 4$ ,  $\Delta x = 4R$ , and  $P = 0.1$ , with system size  $L$  as indicated  
 413 in the figure.

414

415 environments) only serves to accelerate the frequency of extinction cascades within these networks, this  
 416 work offers a mechanism as to why such networks are only rarely observed outside of the lab (25–27).  
 417 We speculate, based on scaling effects, that the increase in surface area-to-volume ratio going from 2D  
 418 into 3D will only enhance the stabilization of asymmetric competition between two species. Conversely,  
 419 given the potential augmentation of structural complexity available in higher dimensions, we expect that  
 420 under similar conditions chaotic fluctuations would be a robust feature of intransitively competing  
 421 communities. We also expect that the shape of the steric barriers will play a non-trivial role in ecosystem  
 422 dynamics and stability; we chose circles for simplicity, as they are characterized by a single parameter.  
 423 The spectrum of available interface curvatures within a particular environmental structure is a function of  
 424 both overall spatial scale (e.g. here  $\Delta x$ ), and the shape of the steric objects themselves. Rationally designed  
 425 structures could be used to tune the range of competitive asymmetries and/or stochastic fluctuations that  
 426 an environment can stably support, and to shift system dynamics and stability to favor particular  
 427 interaction topologies. It is of interest to assess whether our findings are robust when placed in the  
 428 context of other physical and ecological phenomena. For example, how robust are pinned competition  
 429 interfaces to stochastic spatial fluctuations caused either by finite organism size or other forms of motility  
 430 (besides diffusion), tunable interaction strengths, such as with competition sensing (28, 29), or phenotypic  
 431 differentiation (30)? Are chaotic fluctuations a dominant dynamic state when cells can respond to  
 432 chemical gradients via chemotaxis? What are the effects of physical structure on species distributions for



433 larger networks, where specific interaction motifs are embedded within a more complex ecological  
434 context? These extensions will pave the way toward future theoretical work, as well as generating specific  
435 hypotheses to be tested experimentally.

436 Finally, we note that the reductionist approach we take here is valuable toward unravelling the multitude  
437 of forces acting on microbial communities in complex environments. While we focus specifically on  
438 environmental structure, and others give similar focus to flow (31, 32) and chemical gradients (33) in  
439 structuring communities, all of these environmental features are intimately linked and in combination will  
440 modulate impacts on communities in important ways (9). Building a bottom-up understanding of how  
441 various features interact to drive community processes is therefore essential in determining the primary  
442 forces acting on a community in a given environmental context, paving the way toward the ultimate goals  
443 of understanding basal mechanisms of ecosystem dynamics and of targeted and robust interventions in  
444 microbial communities.

## 445 **METHODS**

### 446 *Two species mutual killer simulations*

447 Simulations were randomly seeded with pink noise (34) at an average density of 10% of the carrying  
448 capacity, with each species represented by its own field matrix. Pillars were placed in a triangular lattice  
449 with the specified radius and spacing. Microbial density that coincided with pillar locations was removed  
450 from the simulation. The bounding box and pillar edges were modeled as reflecting boundary conditions.  
451 At each simulated time step ( $\Delta t = 0.1t$ , with  $t$  in doubling times), populations diffused via a symmetric  
452 Gaussian convolution filter with standard deviation set by the diffusion coefficient,  $\sigma = \sqrt{4D\Delta t}$ . After the  
453 diffusion step, changes in population density (growth and death) were calculated using the equations  
454 given in the main text, and used to update the density of each species. Hard upper and lower bounds (1  
455 and 0.001 in units of carrying capacity, respectively) were enforced to improve numerical stability of  
456 simulations; populations densities outside this range were set to 1 and 0, respectively. For each set of  
457 lattice constants and competitive asymmetry values, 30 independently initialized replicates were  
458 simulated for 2000 doubling times. Mean population abundances and images of the simulation were  
459 recorded at an interval of  $0.4t$  for the duration of the simulation. Extinction was defined as the mean  
460 population density of either species dropping below a threshold value of  $((2R)^2 - \pi R^2)/4A$ , where  $R$  is  
461 the pillar radius and  $A$  the area of lattice points not obstructed by pillars, to account for surviving  
462 populations 'trapped' between a pillar and the corner of the simulation box and therefore not in contact  
463 with the rest of the simulation.

### 464 *Calculation of pinned curvature*

465 To obtain higher resolution of pinned curvature in asymmetric competition, two pillars of  $R = 12.9 \lambda$  were  
466 put at two opposing edges of a simulation box, and in contact with the simulation boundary leaving a  
467 single gap between the pillars. Two competing species were symmetrically and uniformly inoculated at  
468 30% of the carrying capacity on either side of this gap, leaving a single flat interface spanning the distance  
469 between the two pillars. Simulations were then allowed to evolve as above until dynamics ceased due to  
470 either pinning or extinction. All combinations of the indicated competitive asymmetries were sampled,  
471 and pillar gap distances were sampled by varying the size of the simulation box. For simulations where  
472 pinning was observed, the interface location was defined as the boundary points where species A and B  
473 were of equal abundance. The interface curvature was calculated from three points along that boundary

474 (the midpoint and the two points in contact with the pillars); this method was found to be more robust  
475 than other circle-fitting methods, especially for low curvatures and narrow pillar gaps.

#### 476 *Intransitive three-species simulations*

477 Three species intransitive simulations were carried out similarly to the two-species cases described above,  
478 with the competition terms in the model modified to reflect the intransitive interaction network topology.  
479 Simulations were inoculated randomly with 10 replicate simulations per structural condition. Unless  
480 otherwise indicated, simulations were evolved for 1,000 doubling times, with images written every  $0.2t$ .

481 A schematic of the classification of simulation dynamics is given in Supplemental Figure 1. Spatiotemporal  
482 autocorrelations were calculated for each simulation, where correlations at each time point were  
483 calculated from the concatenated vectorized simulation matrix of all non-pillar grid locations for each  
484 species, i.e. for the autocorrelation matrix in Supplemental Figure 1, each matrix entry represents the  
485 correlation of two 438,000 (3 species multiplied by 146,000 unique non-pillar grid locations) length  
486 vectors at the indicated time points. Using the autocorrelation matrix, at every time point (i.e. starting  
487 from the matrix diagonal and moving forward in time), that time point was classified as exhibiting limit  
488 cycle dynamics if the autocorrelation rose above the threshold value of 0.8 for at least two cycles. This  
489 threshold was chosen empirically as the level at which isotropic simulations were reliably classified as limit  
490 cycles over the duration of the simulation (excluding grow-in periods and final time points for which future  
491 dynamics were not observed). Extinction events were calculated as in the two-species cases.

492 To establish correlated initial conditions (Figure 4), the following procedure was used: for each replicate  
493 set of simulations, a random initial inoculum at density 10% of the carrying capacity was generated using  
494 the same random seed (i.e. constructing 10 identical initial condition matrices). Then, for each individual  
495 replicate, a randomly selected percentage (as indicated in Figure 4) of non-pillar grid locations were  
496 randomly resampled between 0 and 10% of the carrying capacity. Simulations were then allowed to evolve  
497 as described above. At each time point, each unique pairwise correlation (45 for the 10 replicates used)  
498 between vectorized simulation matrices was calculated, and the mean over all pairwise correlations was  
499 used to generate Figure 4. Correlation traces were truncated upon the first observed extinction event  
500 among the replicates.

#### 501 *Kinetic modeling*

502 For details on assumptions and analysis of the kinetic state model, and derivation of the closed-form  
503 solutions for the time-to-extinction distributions, see Supplemental Text 2. Histograms were generated  
504 from randomly initialized simulations as described above, with 1,000 replicates per set of lattice  
505 constants, each over 10,000 doubling times. Model parameters  $K$  and  $\tau$  were fit by minimizing the squared  
506 error between the empirical cumulative distribution function (CDF) from simulated data and the  
507 corresponding CDF predicted by the model; global minima in the parameter space were found using grid  
508 search. A temporal offset parameter  $\tau_{\text{offset}}$  was also fit to account for grow-in periods, effectively shifting  
509 the histogram along the time axis and setting extinction probability for  $t < \tau_{\text{offset}}$  to zero.

#### 510 *Data availability*

511 Code to run simulations and analyses, as well as processed data from raw images will be posted on Github.

#### 512 **ACKNOWLEDGEMENTS**

513 We thank Kerwyn Huang, Will Ratcliff, Kalin Vetsigian, Ajay Gopinathan, Raghu Parthasarathy, and  
514 Brendan Bohannon for helpful discussions and comments on the manuscript. We also thank Rob Yelle and  
515 Michael Coleman for assistance with high performance computing resources at the University of Oregon.  
516 Research reported in this publication was supported in part by the National Institute of General Medical  
517 Sciences of the National Institutes of Health under award number 1P50GM098911, and the University of  
518 Oregon to TSU. This work was performed in part at Aspen Center for Physics, which is supported by  
519 National Science Foundation grant PHY-1607611. The content is solely the responsibility of the authors  
520 and does not necessarily represent the official views of the National Institutes of Health.

## 521 REFERENCES

- 522 1. Friedman J, Higgins LM, Gore J (2017) Community structure follows simple assembly rules in  
523 microbial microcosms. *Nat Ecol Evol* 1:0109.
- 524 2. Faust K, et al. (2012) Microbial Co-occurrence Relationships in the Human Microbiome. 8(7).  
525 doi:10.1371/journal.pcbi.1002606.
- 526 3. McNally L, et al. (2017) Killing by Type VI secretion drives genetic phase separation and correlates  
527 with increased cooperation. *Nat Commun* 8:14371.
- 528 4. Kerr B, Riley MA, Feldman MW, Bohannon BJM (2002) Local dispersal promotes biodiversity in a  
529 real-life game of rock–paper–scissors. *Nature* 418(6894):171–174.
- 530 5. Reichenbach T, Mobilia M, Frey E (2007) Mobility promotes and jeopardizes biodiversity in rock–  
531 paper–scissors games. *Nature* 448(7157):1046–1049.
- 532 6. Xiong L, Cooper R, Tsimring LS (2018) Coexistence and Pattern Formation in Bacterial Mixtures  
533 with Contact-Dependent Killing. *Biophys J* 114(7):1741–1750.
- 534 7. Coyte KZ, Schluter J, Foster KR (2015) The ecology of the microbiome: networks, competition and  
535 stability. *Science (80- )* 350(6261):663–6.
- 536 8. Drescher K, Shen Y, Bassler BL, Stone H a (2013) Biofilm streamers cause catastrophic disruption  
537 of flow with consequences for environmental and medical systems. *Proc Natl Acad Sci U S A*  
538 110(11):4345–50.
- 539 9. Nadell CD, Ricaurte D, Yan J, Drescher K, Bassler BL (2017) Flow environment and matrix  
540 structure interact to determine spatial competition in *Pseudomonas aeruginosa* biofilms. *Elife*  
541 6:e21855.
- 542 10. Earle KA, et al. (2015) Quantitative Imaging of Gut Microbiota Spatial Resource Quantitative  
543 Imaging of Gut Microbiota Spatial Organization. *Cell Host Microbe* 18(4):478–488.
- 544 11. Tropini C, Earle KA, Huang KC, Sonnenburg JL (2017) The Gut Microbiome: Connecting Spatial  
545 Organization to Function. *Cell Host Microbe* 21(4):433–442.
- 546 12. Wiles TJ, et al. (2016) Host Gut Motility Promotes Competitive Exclusion within a Model Intestinal  
547 Microbiota. *PLoS Biol* 14(7):e1002517.
- 548 13. Mark Welch JL, Rossetti BJ, Rieken CW, Dewhirst FE, Borisy GG (2016) Biogeography of a human  
549 oral microbiome at the micron scale. *Proc Natl Acad Sci* 113(6):E791–E800.
- 550 14. Groselj D, Jenko F, Frey E (2015) How turbulence regulates biodiversity in systems with cyclic

- 551 competition. *Phys Rev E - Stat Nonlinear, Soft Matter Phys* 91(033009).  
552 doi:10.1103/PhysRevE.91.033009.
- 553 15. Szolnoki A, Szabó G (2004) Phase transitions for rock-scissors-paper game on different networks.  
554 *Phys Rev E - Stat Nonlinear, Soft Matter Phys* 70(037102):1–4.
- 555 16. Russell AB, Peterson SB, Mougous JD (2014) Type VI secretion system effectors: Poisons with a  
556 purpose. *Nat Rev Microbiol* 12(2):137–148.
- 557 17. Drissi F, Buffet S, Raoult D, Merhej V (2015) Common occurrence of antibacterial agents in  
558 human intestinal microbiota. *Front Microbiol* 6(MAY):1–8.
- 559 18. May RM, Leonard WJ (1975) Nonlinear Aspects of Competition Between Three Species. *SIAM J*  
560 *Appl Math* 29(2):243–253.
- 561 19. Reichenbach T, Mobilia M, Frey E (2006) Coexistence versus extinction in the stochastic cyclic  
562 Lotka-Volterra model. *Phys Rev E - Stat Nonlinear, Soft Matter Phys* 74(5):1–11.
- 563 20. Strogatz SH (2001) *Nonlinear Dynamics and Chaos: With Applications to Physics, Biology,*  
564 *Chemistry and Engineering* (Westview Press).
- 565 21. Kim HJ, Boedicker JQ, Choi JW, Ismagilov RF (2008) Defined spatial structure stabilizes a synthetic  
566 multispecies bacterial community. *Proc Natl Acad Sci* 105(47):18188–18193.
- 567 22. Oliveira NM, Niehus R, Foster KR (2014) Evolutionary limits to cooperation in microbial  
568 communities. *Proc Natl Acad Sci* 111(50):17941–17946.
- 569 23. Levine JM, Bascompte J, Adler PB, Allesina S (2017) Beyond pairwise mechanisms of species  
570 coexistence in complex communities. *Nature* 546:56–64.
- 571 24. Gallien L, Zimmermann NE, Levine JM, Adler PB (2017) The effects of intransitive competition on  
572 coexistence. *Ecol Lett* 20(7):791–800.
- 573 25. Sinervo B, Lively CM (1996) The rock-paper-scissors game and the evolution of alternative male  
574 strategies. *Nature* 380:240–243.
- 575 26. Kirkup BC, Riley MA (2004) Antibiotic-mediated antagonism leads to a bacterial game of rock-  
576 paper-scissors in vivo. *Nature* 428(6981):412–414.
- 577 27. Godoy O, Stouffer DB, Kraft NJB, Levine JM (2017) Intransitivity is infrequent and fails to promote  
578 annual plant coexistence without pairwise niche differences. *Ecology* 98(5):1193–1200.
- 579 28. Cornforth DM, Foster KR (2013) Competition sensing: the social side of bacterial stress responses.  
580 *Nat Rev Microbiol* 11(4):285–293.
- 581 29. Mavridou DAI, Gonzalez D, Kim W, West SA, Foster KR (2018) Bacteria Use Collective Behavior to  
582 Generate Diverse Combat Strategies. *Curr Biol* 28:1–11.
- 583 30. Lowery NV, McNally L, Ratcliff WC, Brown SP (2017) Division of labor, bet hedging, and the  
584 evolution of mixed biofilm investment strategies. *MBio* 8(4). doi:10.1128/mBio.00672-17.
- 585 31. Martinez-Garcia R, Nadell CD, Hartmann R, Drescher K, Bonachela JA (2018) Cell adhesion and  
586 fluid flow jointly initiate genotype spatial distribution in biofilms. *PLoS Comput Biol*  
587 14(4):e1006094.

- 588 32. Siryaporn A, Kim MK, Shen Y, Stone HA, Gitai Z (2015) Colonization, competition, and dispersal of  
589 pathogens in fluid flow networks. *Curr Biol* 25(9):1201–1207.
- 590 33. Borer B, Tecon R, Or D (2018) Spatial organization of bacterial populations in response to oxygen  
591 and carbon counter-gradients in pore networks. *Nat Commun* 9(769). doi:10.1038/s41467-018-  
592 03187-y.
- 593 34. Milotti E (2002) 1/F Noise: a Pedagogical Review. *arXiv*. doi:10.1016/j.jep.2010.11.024.

594

## 595 SUPPLEMENTAL MOVIE LEGENDS

596 **Supplemental Movie 1: Symmetric two-species competition in structurally isotropic and anisotropic**  
597 **environments.** Simulation parameters are  $L / (1.29 \lambda) = 100$ ,  $P = 0.1$ , with  $R / (1.29 \lambda) = 2$  and  $\Delta x = 3.4 R$   
598 for the anisotropic case. The movie depicts system dynamics over 360 doubling times; the anisotropic  
599 simulation is pinned after approximately 60 doubling times.

600 **Supplemental Movie 2: Pinning and coexistence of species with asymmetric competitive fitness.**  
601 Simulation parameters are  $L / (1.29 \lambda) = 100$ ,  $P_A = 0.112$ ,  $P_B = 0.088$ ,  $R / (1.29 \lambda) = 2$  and  $\Delta x = 3 R$ . The  
602 movie depicts system dynamics over 85 doubling times.

603 **Supplemental Movie 3: Large and widely spaced pillars do not significantly perturb intransitive**  
604 **communities.** Simulation parameters are  $L / (1.29 \lambda) = 100$ ,  $P = 0.1$ ,  $R / (1.29 \lambda) = 8$ ,  $\Delta x = 5 R$ . The movie  
605 depicts system dynamics over 1,000 doubling times.

606 **Supplemental Movie 4: Dense pillars induce wave destabilization and community collapse.** Simulation  
607 parameters are  $L / (1.29 \lambda) = 100$ ,  $P = 0.1$ ,  $R / (1.29 \lambda) = 10$ ,  $\Delta x = 2.6 R$ . The movie depicts system dynamics  
608 over 1,000 doubling times.

609 **Supplemental Movie 5: Pillars may serve as unstable wave centers.** Simulation parameters are  $L / (1.29$   
610  $\lambda) = 100$ ,  $P = 0.1$ ,  $R / (1.29 \lambda) = 6$ ,  $\Delta x = 3.4 R$ . The movie depicts system dynamics over 1,000 doubling  
611 times.

612 **Supplemental Movie 6: Small dense pillars can ‘cage’ wave centers and prolong community coexistence**  
613 **under chaotic dynamics.** Simulation parameters are  $L / (1.29 \lambda) = 100$ ,  $P = 0.1$ ,  $R / (1.29 \lambda) = 2$ ,  $\Delta x = 2.4 R$ .  
614 The movie depicts system dynamics over 1,000 doubling times.
